# Supplementary material for: One-pot preparation of supramolecularly functionalized silver nanoparticles for surface plasmon resonance based dual-modal sensing of phytotoxic polychlorinated biphenyl
Source: Royal Society of Chemistry journal article supplement (doi:10.1039/d3ay01137b), 2023-01-01
Supplement: d3ay01137b1.pdf [file d3ay01137b1.pdf]

Journal name: Analytical Methods

### **Electronic Supplementary Material**

One-Pot Preparation of Supramolecularly Functionalized Silver Nanoparticle for Surface Plasmon Resonance Based Dual-Modal Sensing of Phytotoxic Polychlorinated Biphenyl

Jingcheng Cui,<sup>a</sup> Shichao Chen,<sup>b</sup> Yu Wang,<sup>a</sup> Zhongyuan Ji,<sup>c</sup> Wenhui Lu,<sup>c</sup> Yanyan Zhu,<sup>a</sup> Yongshan Ma,<sup>a</sup> Feiyong Chen<sup>d</sup> and Guiqin Zhang<sup>\*a</sup>

<sup>a</sup> School of Municipal and Environmental Engineering, Shandong Jianzhu University, Jinan 250101, Shandong, China.

<sup>b</sup> Department of Pharmacy, Affiliated Hospital of Shandong University of Traditional Chinese Medicine Jinan 250014, Shandong, China.

<sup>c</sup> Address here. Characteristic Laboratory of Forensic Science in Universities of Shandong Province, Shandong University of Political Science and Law, Jinan 250014, Shandong Province, P.R. China.

<sup>d</sup> Research Institute of Resources and Environmental Innovation, Shandong Jianzhu University, Jinan 250101, China.

\*Corresponding author

## FIGURE

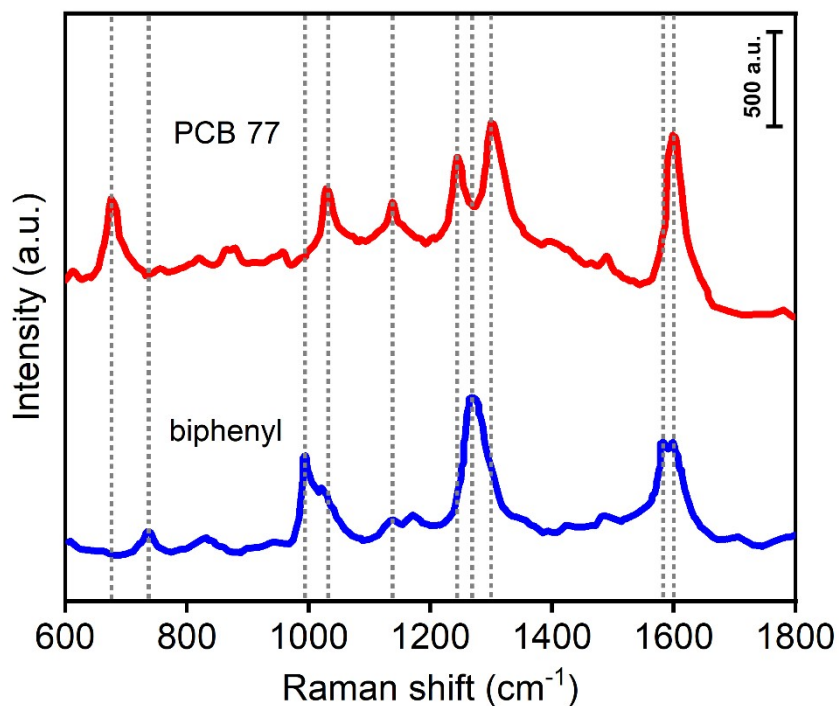

**Fig. S1** The SERS spectra of PCB 77 and biphenyl sensed by the  $\beta$ -CD modified Ag NPs.

## TABLE

**Table S1** The calculation of LOD

| Method | $\sigma$ | Calibration curve     | LOD     |
|--------|----------|-----------------------|---------|
| SP-RLS | 0.22     | $y = 62.93 + 9.18 x$  | 0.07 nM |
| SERS   | 0.13     | $y = 32.72 + 13.21 x$ | 0.03 pM |

$\sigma$ , the standard deviation above blanks;  $y$ , the intensity;  $x$ , the concentration.

$$\text{LOD} = 3\sigma/S$$

where  $S$  is the slope of the calibration curve. The units of  $S$  are (a.u./nM) in SP-RLS curve and (a.u./pM) in SERS curve.
